# Supplementary material
Source: publisher figshare collection journal article supplement (https://tandf.figshare.com/articles/dataset/_/7110752)
Supplement: Supplementary file 1 [file 1]

Archive with 3 entries (3 files):
- icmt_a_1507020_sm6005.pdf
- icmt_a_1507020_sm6003.pdf
- icmt_a_1507020_sm0833.pdf
