# Supplementary material
Source: publisher figshare collection journal article supplement (https://tandf.figshare.com/articles/dataset/_/7110752)
Supplement: Supplementary file 1 [file 1 › icmt_a_1507020_sm6003.pdf]

**S 2 Differences of BTMs (CTx, P1NP) in participants with normal BMD and those with low BMD (osteopenia, and osteoporosis)**

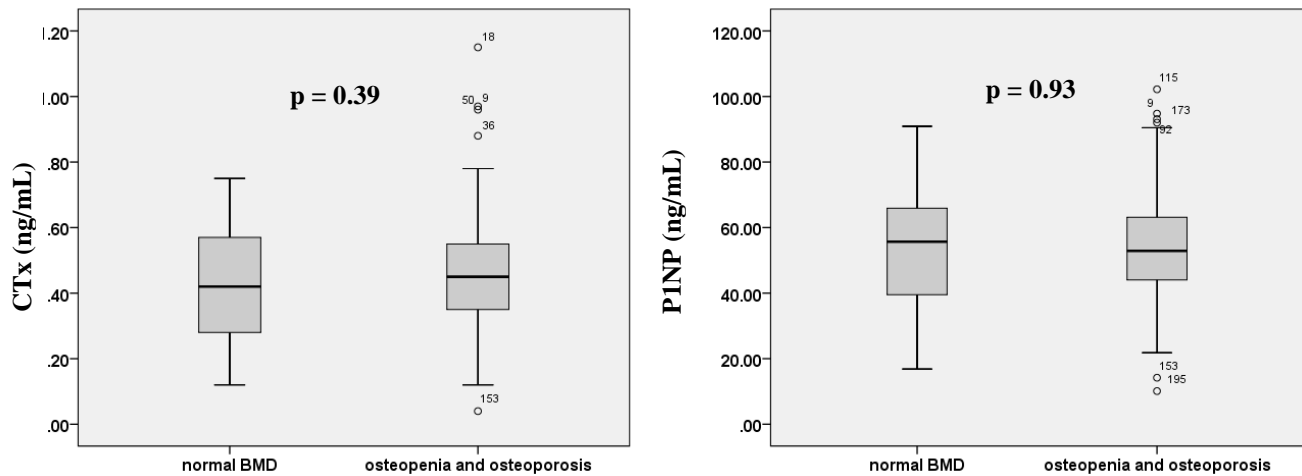

- (A) CTx levels were not significantly different between participants with normal BMD and those with low BMD (osteopenia and osteoporosis) ( $p = 0.38$ , independent samples t-test).
- (B) P1NP levels were not significantly different between patients from the low BMD group (osteopenia and osteoporosis) compared to the normal BMD group ( $p = 0.93$ , independent samples t-test).
