# Supplementary material
Source: publisher figshare collection journal article supplement (https://tandf.figshare.com/articles/dataset/_/7110752)
Supplement: Supplementary file 1 [file 1 › icmt_a_1507020_sm6005.pdf]

### **S 3 Baseline characteristics of normal BMD and low BMD participants (N = 150)**

|                                           | <b>Normal BMD (n=41)</b> | <b>Low BMD (n =109)</b> |
|-------------------------------------------|--------------------------|-------------------------|
| Age (years) <sup>a</sup>                  | 57.37 $\pm$ 6.34         | 61.19 $\pm$ 6.64*       |
| BMI (kg/m <sup>2</sup> ) <sup>a</sup>     | 26.52 $\pm$ 3.82         | 24.54 $\pm$ 3.45*       |
| Age of menopause (years) <sup>a</sup>     | 49.15 $\pm$ 2.96         | 49.39 $\pm$ 3.96        |
| Year since menopause (years) <sup>a</sup> | 8.22 $\pm$ 6.70          | 11.80 $\pm$ 7.54*       |

a = Independent Samples T-test, Data are presented as mean  $\pm$  S.D.

\* The difference is significant because the p-value is < 0.05.
